# Supplementary material
Source: Elsevier journal article supplement (https://comptes-rendus.academie-sciences.fr/chimie/article/10.1016/j.crci.2010.01.009/file/attach/mmc8.pdf)

# checkCIF/PLATON report

No syntax errors found.    CIF dictionary    Interpreting this report

## Datablock: 1

---

Bond precision:    C-C = 0.0078 A                      Wavelength=0.71073

Cell:              a=6.8486(6)              b=7.3506(7)              c=9.2054(8)  
                    alpha=85.915(1)          beta=79.327(1)          gamma=64.478(1)

Temperature:      298 K

|                | Calculated           | Reported            |
|----------------|----------------------|---------------------|
| Volume         | 410.94(6)            | 410.94(6)           |
| Space group    | P -1                 | P -1                |
| Hall group     | -P 1                 | ?                   |
| Moiety formula | C10 H10 N2, Br4 O2 U | ?                   |
| Sum formula    | C10 H10 Br4 N2 O2 U  | C10 H10 Br4 N2 O2 U |
| Mr             | 747.83               | 747.87              |
| Dx,g cm-3      | 3.022                | 3.022               |
| Z              | 1                    | 1                   |
| Mu (mm-1)      | 19.595               | 19.595              |
| F000           | 332.0                | 332.0               |
| F000'          | 321.74               |                     |
| h,k,lmax       | 9,10,13              | 9,10,12             |
| Nref           | 2472                 | 2285                |
| Tmin,Tmax      | 0.166,0.309          | 0.166,0.309         |
| Tmin'          | 0.087                |                     |

Correction method= EMPIRICAL

Data completeness= 0.924                      Theta(max)= 30.330

R(reflections)= 0.0255( 2066)              wR2(reflections)= 0.0543( 2285)

S = 1.050                                      Npar= 88

---

The following ALERTS were generated. Each ALERT has the format

**test-name\_ALERT\_alert-type\_alert-level.**

Click on the hyperlinks for more details of the test.

---

### Alert level C

|                   |                                                  |                                  |           |
|-------------------|--------------------------------------------------|----------------------------------|-----------|
| PLAT241_ALERT_2_C | Check High                                       | Ueq as Compared to Neighbors for | C1        |
| PLAT241_ALERT_2_C | Check High                                       | Ueq as Compared to Neighbors for | C2        |
| PLAT242_ALERT_2_C | Check Low                                        | Ueq as Compared to Neighbors for | C3        |
| PLAT242_ALERT_2_C | Check Low                                        | Ueq as Compared to Neighbors for | U1        |
| PLAT250_ALERT_2_C | Large U3/U1 Ratio for Average U(i,j) Tensor .... |                                  | 3.28      |
| PLAT432_ALERT_2_C | Short Inter X...Y Contact                        | O1 .. C5 ..                      | 2.99 Ang. |



S = 1.041

Npar= 97

---

The following ALERTS were generated. Each ALERT has the format  
**test-name\_ALERT\_alert-type\_alert-level.**  
Click on the hyperlinks for more details of the test.

---

● **Alert level C**

```
PLAT232_ALERT_2_C Hirshfeld Test Diff (M-X) U1 -- Br1 .. 6.76 su
PLAT232_ALERT_2_C Hirshfeld Test Diff (M-X) U1 -- Br2 .. 6.51 su
PLAT242_ALERT_2_C Check Low Ueq as Compared to Neighbors for U1
PLAT432_ALERT_2_C Short Inter X...Y Contact O1 .. C5 .. 2.99 Ang.
PLAT480_ALERT_4_C Long H...A H-Bond Reported H1 .. BR2 .. 2.94 Ang.
PLAT790_ALERT_4_C Centre of Gravity not Within Unit Cell: Resd. # 1
C12 H14 N2
```

---

● **Alert level G**

```
PLAT154_ALERT_1_G The su's on the Cell Angles are Equal (x 1000) 400 Deg.
```

---

0 **ALERT level A** = In general: serious problem

0 **ALERT level B** = Potentially serious problem

6 **ALERT level C** = Check and explain

1 **ALERT level G** = General alerts; check

1 ALERT type 1 CIF construction/syntax error, inconsistent or missing data

4 ALERT type 2 Indicator that the structure model may be wrong or deficient

0 ALERT type 3 Indicator that the structure quality may be low

2 ALERT type 4 Improvement, methodology, query or suggestion

0 ALERT type 5 Informative message, check

---

## Datablock: 3

---

Bond precision: C-C = 0.0052 A

Wavelength=0.71073

Cell: a=7.0925(6)

b=8.4033(9)

c=8.7823(8)

alpha=80.634(2)

beta=73.087(1)

gamma=65.055(1)

Temperature: 298 K

|                | Calculated           | Reported            |
|----------------|----------------------|---------------------|
| Volume         | 453.59(7)            | 453.59(7)           |
| Space group    | P -1                 | P -1                |
| Hall group     | -P 1                 | ?                   |
| Moiety formula | C12 H12 N2, Br4 O2 U | ?                   |
| Sum formula    | C12 H12 Br4 N2 O2 U  | C12 H12 Br4 N2 O2 U |
| Mr             | 773.87               | 773.91              |
| Dx,g cm-3      | 2.833                | 2.833               |
| Z              | 1                    | 1                   |
| Mu (mm-1)      | 17.758               | 17.758              |
| F000           | 346.0                | 346.0               |
| F000'          | 335.73               |                     |
| h,k,lmax       | 10,11,12             | 10,11,12            |
| Nref           | 2709                 | 2496                |
| Tmin,Tmax      | 0.290,0.587          | 0.447,0.712         |
| Tmin'          | 0.163                |                     |

Correction method= EMPIRICAL

Data completeness= 0.921

Theta(max)= 30.260

R(reflections)= 0.0189( 2397)

wR2(reflections)= 0.0464( 2496)

S = 1.004

Npar= 97

The following ALERTS were generated. Each ALERT has the format

**test-name\_ALERT\_alert-type\_alert-level.**

Click on the hyperlinks for more details of the test.

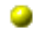

#### Alert level C

PLAT232\_ALERT\_2\_C Hirshfeld Test Diff (M-X) U1 -- Br1 .. 6.46 su  
 PLAT242\_ALERT\_2\_C Check Low Ueq as Compared to Neighbors for U1

0 ALERT level A = In general: serious problem

0 ALERT level B = Potentially serious problem

2 ALERT level C = Check and explain

0 ALERT level G = General alerts; check

0 ALERT type 1 CIF construction/syntax error, inconsistent or missing data

2 ALERT type 2 Indicator that the structure model may be wrong or deficient

0 ALERT type 3 Indicator that the structure quality may be low

0 ALERT type 4 Improvement, methodology, query or suggestion

0 ALERT type 5 Informative message, check

## Datablock: 4

Bond precision: C-C = 0.0065 A

Wavelength=0.71073

Cell: a=8.1574(4) b=9.8222(4) c=9.8893(4)  
 alpha=94.769(1) beta=100.771(1) gamma=91.591(1)  
 Temperature: 298 K

|                | Calculated                              | Reported            |
|----------------|-----------------------------------------|---------------------|
| Volume         | 774.95(6)                               | 774.95(6)           |
| Space group    | P -1                                    | P -1                |
| Hall group     | -P 1                                    | ?                   |
| Moiety formula | 2(C10 H11 N3), Br4 O2 U,<br>2(Br), 2(O) | ?                   |
| Sum formula    | C20 H22 Br6 N6 O4 U                     | C20 H26 BR6 N6 O4 U |
| Mr             | 1127.87                                 | 1131.96             |
| Dx,g cm-3      | 2.417                                   | 2.426               |
| Z              | 1                                       | 1                   |
| Mu (mm-1)      | 13.006                                  | 13.006              |
| F000           | 518.0                                   | 522.0               |
| F000'          | 507.20                                  |                     |
| h,k,lmax       | 11,13,14                                | 11,13,13            |
| Nref           | 4691                                    | 4295                |
| Tmin,Tmax      | 0.463,0.771                             | 0.463,0.771         |
| Tmin'          | 0.350                                   |                     |

Correction method= EMPIRICAL

Data completeness= 0.916

Theta(max)= 30.420

R(reflections)= 0.0331( 3394)

wR2(reflections)= 0.0740( 4295)

S = 1.001

Npar= 173

The following ALERTS were generated. Each ALERT has the format  
**test\_name\_ALERT\_alert-type\_alert-level**.  
 Click on the hyperlinks for more details of the test.

#### Alert level A

PLAT306\_ALERT\_2\_A Isolated Oxygen Atom (H-atoms Missing ?) ..... OW1

#### Alert level C

PLAT222\_ALERT\_3\_C Large Non-Solvent H Ueq(max)/Ueq(min) ... 3.50 Ratio  
 PLAT242\_ALERT\_2\_C Check Low Ueq as Compared to Neighbors for U1  
 PLAT245\_ALERT\_2\_C U(iso) HN2 Smaller than U(eq) N2 by ... 0.01 AngSq  
 PLAT352\_ALERT\_3\_C Short N-H Bond (0.87A) N2 - HN2 ... 0.73 Ang.  
 PLAT431\_ALERT\_2\_C Short Inter HL..A Contact Br3 .. OW1 .. 3.26 Ang.  
 PLAT041\_ALERT\_1\_C Calc. and Reported SumFormula Strings Differ ?  
 PLAT068\_ALERT\_1\_C Reported F000 Differs from Calcd (or Missing)... ?  
 PLAT153\_ALERT\_1\_C The su's on the Cell Axes are Equal (x 100000) 40 Ang.  
 PLAT480\_ALERT\_4\_C Long H...A H-Bond Reported H1 .. BR3 .. 3.06 Ang.

#### Alert level G

FORMU01\_ALERT\_2\_G There is a discrepancy between the atom counts in the  
 \_chemical\_formula\_sum and the formula from the \_atom\_site\* data.  
 Atom count from \_chemical\_formula\_sum: C20 H26 Br6 N6 O4 U1  
 Atom count from the \_atom\_site data: C20 H22 Br6 N6 O4 U1

CELLZ01\_ALERT\_1\_G Difference between formula and atom\_site contents detected.  
 CELLZ01\_ALERT\_1\_G WARNING: H atoms missing from atom site list. Is this intentional?  
 From the CIF: \_cell\_formula\_units\_Z 1  
 From the CIF: \_chemical\_formula\_sum C20 H26 Br6 N6 O4 U  
 TEST: Compare cell contents of formula and atom\_site data

| atom | Z*formula | cif sites | diff |
|------|-----------|-----------|------|
| C    | 20.00     | 20.00     | 0.00 |
| H    | 26.00     | 22.00     | 4.00 |
| Br   | 6.00      | 6.00      | 0.00 |
| N    | 6.00      | 6.00      | 0.00 |
| O    | 4.00      | 4.00      | 0.00 |
| U    | 1.00      | 1.00      | 0.00 |

PLAT154\_ALERT\_1\_G The su's on the Cell Angles are Equal (x 10000) 100 Deg.  
 PLAT720\_ALERT\_4\_G Number of Unusual/Non-Standard Labels ..... 2

- 
- 1 **ALERT level A** = In general: serious problem  
 0 **ALERT level B** = Potentially serious problem  
 9 **ALERT level C** = Check and explain  
 5 **ALERT level G** = General alerts; check
- 6 ALERT type 1 CIF construction/syntax error, inconsistent or missing data  
 5 ALERT type 2 Indicator that the structure model may be wrong or deficient  
 2 ALERT type 3 Indicator that the structure quality may be low  
 2 ALERT type 4 Improvement, methodology, query or suggestion  
 0 ALERT type 5 Informative message, check
- 

## Datablock: 5

---

**Bond precision:** C-C = 0.0131 A                      **Wavelength=0.71073**

**Cell:**                      **a=8.6949(10)**                      **b=9.0059(11)**                      **c=11.7255(14)**  
                                  **alpha=79.156(2)**                      **beta=74.365(2)**                      **gamma=82.360(2)**

**Temperature:**    298 K

|                | Calculated                        | Reported            |
|----------------|-----------------------------------|---------------------|
| Volume         | 865.12(18)                        | 865.12(18)          |
| Space group    | P -1                              | P -1                |
| Hall group     | -P 1                              | ?                   |
| Moiety formula | 2(C13 H16 N2), Br4 O2 U,<br>2(Br) | ?                   |
| Sum formula    | C26 H32 Br6 N4 O2 U               | C26 H32 Br6 N4 O2 U |
| Mr             | 1149.99                           | 1150.05             |
| Dx,g cm-3      | 2.207                             | 2.207               |
| Z              | 1                                 | 1                   |
| Mu (mm-1)      | 11.647                            | 11.647              |
| F000           | 534.0                             | 534.0               |
| F000'          | 523.17                            |                     |
| h,k,lmax       | 12,12,16                          | 12,12,16            |
| Nref           | 5104                              | 4628                |
| Tmin,Tmax      | 0.577,0.792                       | 0.463,0.771         |
| Tmin'          | 0.390                             |                     |

Correction method= EMPIRICAL

Data completeness= 0.907

Theta(max)= 30.120

R(reflections)= 0.0473( 2960)

wR2(reflections)= 0.1163( 4628)

S = 1.030

Npar= 178

The following ALERTS were generated. Each ALERT has the format

**test-name\_ALERT\_alert-type\_alert-level.**

Click on the hyperlinks for more details of the test.

### Alert level C

|                   |                                                 |                                  |           |
|-------------------|-------------------------------------------------|----------------------------------|-----------|
| PLAT241_ALERT_2_C | Check High                                      | Ueq as Compared to Neighbors for | C6        |
| PLAT242_ALERT_2_C | Check Low                                       | Ueq as Compared to Neighbors for | C5        |
| PLAT342_ALERT_3_C | Low Bond Precision on                           | C-C Bonds (x 1000) Ang ..        | 13        |
| PLAT234_ALERT_4_C | Large Hirshfeld Difference                      | C5 -- C6 ..                      | 0.20 Ang. |
| PLAT234_ALERT_4_C | Large Hirshfeld Difference                      | C7 -- C8 ..                      | 0.19 Ang. |
| PLAT244_ALERT_4_C | Low 'Solvent' Ueq as Compared to Neighbors of   |                                  | U1        |
| PLAT790_ALERT_4_C | Centre of Gravity not Within Unit Cell: Resd. # |                                  | 1         |
|                   | C13 H16 N2                                      |                                  |           |
| PLAT790_ALERT_4_C | Centre of Gravity not Within Unit Cell: Resd. # |                                  | 3         |
|                   | Br                                              |                                  |           |

### Alert level G

|                   |                                                 |          |
|-------------------|-------------------------------------------------|----------|
| PLAT154_ALERT_1_G | The su's on the Cell Angles are Equal (x 10000) | 200 Deg. |
|-------------------|-------------------------------------------------|----------|

- 0 ALERT level A = In general: serious problem
- 0 ALERT level B = Potentially serious problem
- 8 ALERT level C = Check and explain
- 1 ALERT level G = General alerts; check

1 ALERT type 1 CIF construction/syntax error, inconsistent or missing data  
2 ALERT type 2 Indicator that the structure model may be wrong or deficient  
1 ALERT type 3 Indicator that the structure quality may be low  
5 ALERT type 4 Improvement, methodology, query or suggestion  
0 ALERT type 5 Informative message, check

---



Database 1 - refined plot

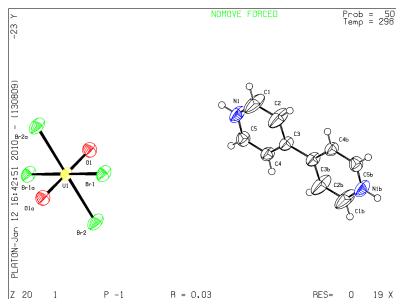

Database plot2 - refined plot

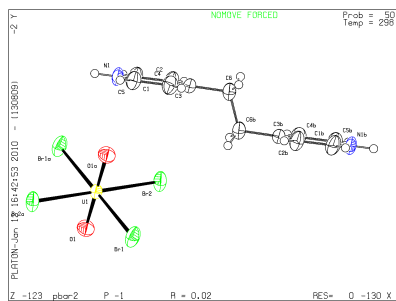

Database 3 - refined plot

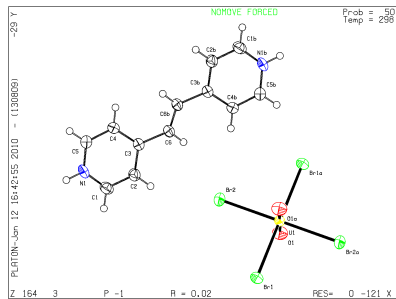

Database 4 - refined plot

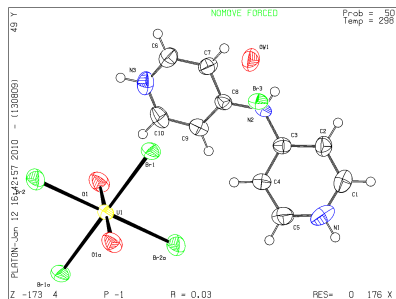

Database 5 - refined plot

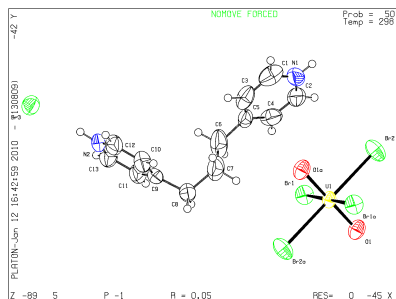

Supplement: mmc8 [file mmc8.pdf]
